# Supplementary material for: Effects of Climatic Conditions and Soil Properties on Cabernet Sauvignon Berry Growth and Anthocyanin Profiles
Source: Molecules. 2014 Sep 2;19(9):13683–703. doi: 10.3390/molecules190913683 (PMC6271934; doi:10.3390/molecules190913683)
Supplement: Supplementary File 1 [file molecules-19-13683-s001.pdf]

## Supplementary File

**Figure S1.** Sketch of Slope trunk with vertical shoot positioning training system (M-VSP).

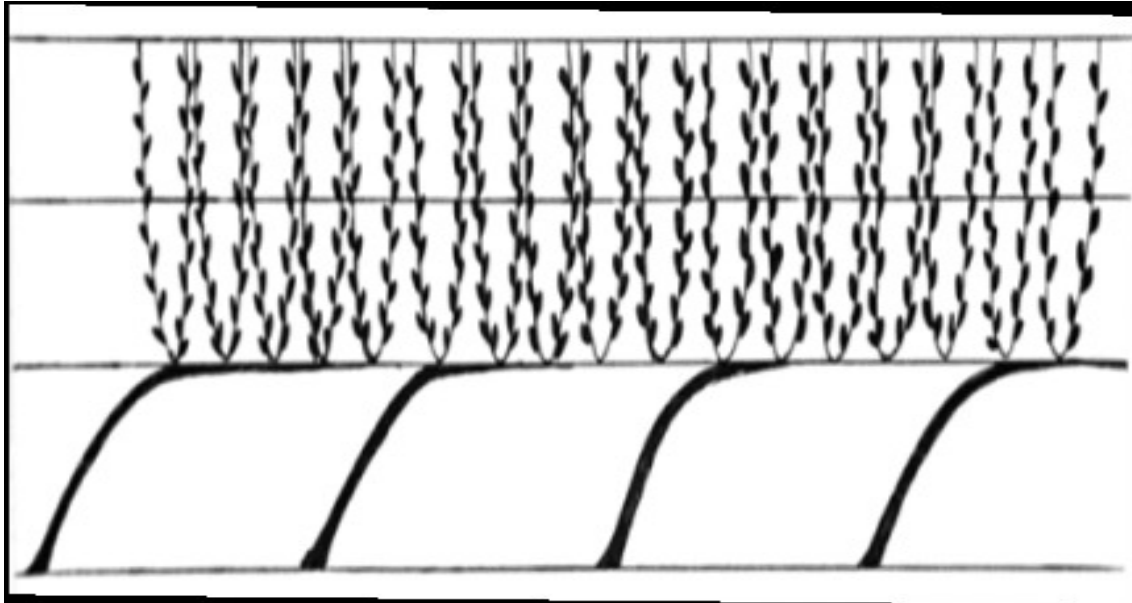

**Table S1.** Correlation coefficients between some variables on ‘Cabernet sauvignon’ grape from two vineyards in 2011 and 2012. A, Total concentrations of anthocyanins; B, 3'5'-substituted anthocyanins; C, 3'-substituted anthocyanins; D, non-acylated anthocyanins; E, acetylated anthocyanins; F, cinnamylated anthocyanins; G, non-methoxylated; H, methoxylated anthocyanins; I, berry fresh weight; J, skin fresh weight; K, cluster weight; L, cluster compactness; M,  $\delta^{13}\text{C}$ ; N, N status of the plant; O, Leaf chlorophyll II; P, organic matter in soils; Q, water content in soils.

| Variant | B       | C     | D      | E       | F     | G     | H       | I       | J      | K      | L       | M       | N       | O        | P       | Q       |
|---------|---------|-------|--------|---------|-------|-------|---------|---------|--------|--------|---------|---------|---------|----------|---------|---------|
| A       | 0.999** | 0.718 | 0.950* | 0.998** | 0.749 | 0.749 | 0.996   | -0.677  | 0.951* | -0.551 | -0.972* | 0.968*  | -0.961* | -0.92    | -0.939  | -0.939  |
| B       |         | 0.69  | 0.946  | 0.999** | 0.753 | 0.755 | 0.994** | -0.67   | 0.956* | -0.527 | -0.961* | 0.956*  | -0.965* | -0.927   | -0.928  | -0.928  |
| C       |         |       | 0.821  | 0.673   | 0.281 | 0.63  | 0.703   | -0.788  | 0.515  | -0.547 | -0.825  | 0.825   | -0.69   | -0.452   | -0.746  | -0.746  |
| D       |         |       |        | 0.934   | 0.506 | 0.894 | 0.92    | -0.872  | 0.809  | -0.375 | -0.924  | 0.916   | -0.979* | -0.754   | -0.834  | -0.834  |
| E       |         |       |        |         | 0.774 | 0.736 | 0.995** | -0.645  | 0.965* | -0.541 | -0.959* | 0.955   | -0.957* | 0.939    | -0.933  | -0.933  |
| F       |         |       |        |         |       | 0.155 | 0.803   | -0.02   | 0.908  | -0.776 | -0.743  | 0.749   | -0.567  | -0.938   | -0.846  | -0.846  |
| G       |         |       |        |         |       |       | 0.683   | -0.951* | 0.555  | 0.081  | -0.655  | 0.640   | -0.900  | -0.487   | -0.505  | -0.505  |
| H       |         |       |        |         |       |       |         | -0.611  | 0.969* | -0.62  | -0.978* | 0.976*  | -0.93   | -0.945   | -0.964* | -0.964* |
| I       |         |       |        |         |       |       |         |         | -0.425 | -0.011 | 0.648   | -0.636  | 0.816   | 0.344    | 0.458   | 0.485   |
| J       |         |       |        |         |       |       |         |         |        | -0.627 | -0.909  | 0.908   | -0.86   | -0.996** | -0.932  | -0.932  |
| K       |         |       |        |         |       |       |         |         |        |        | 0.696   | -0.71   | 0.306   | 0.644    | 0.804   | 0.804   |
| L       |         |       |        |         |       |       |         |         |        |        |         | -1.00** | 0.892   | 0.877    | 0.98*   | 0.98*   |
| M       |         |       |        |         |       |       |         |         |        |        |         |         | -0.883  | -0.877   | -0.983* | -0.983* |
| N       |         |       |        |         |       |       |         |         |        |        |         |         |         | 0.814    | 0.811   | 0.811   |
| O       |         |       |        |         |       |       |         |         |        |        |         |         |         |          | 0.916   | 0.916   |
| P       |         |       |        |         |       |       |         |         |        |        |         |         |         |          |         | 1.00**  |

\*\* significant at 0.01 level, \* significant at 0.05 level.
